# Supplementary material
Source: PubMed Central journal article supplement (PMC100295)
Supplement: nar_30_3_675__1.pdf [file nar_30_3_675__1.pdf]

**SUPPLEMENTARY MATERIAL**

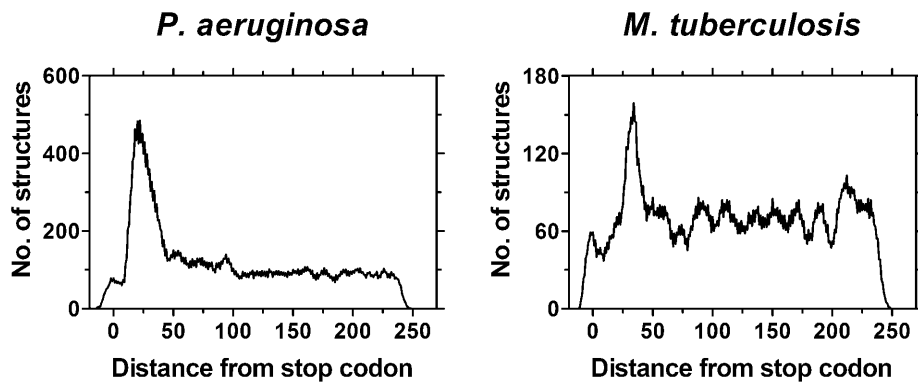

**Figure S1.** Distribution of Best Candidate structures in the region downstream (-20 to +270 nt from the stop codon) of coding regions. These regions are defined without restriction by the start position of downstream genes.
